# Supplementary material for: FTO gene variation and measures of body mass in an African population
Source: PubMed Central journal article supplement (PMC2666669; doi:10.1186/1471-2350-10-21), 2009-03-05
Supplement: 1471-2350-10-21-S3.pdf [file 1471-2350-10-21-S3.pdf]

### Additional file 3

**Table S1:** Sample size breakdown by outcome measure and reason for inclusion

|                                                                                          | Principle relationship to index <sup>§</sup> child * |        |         |             |       |             |
|------------------------------------------------------------------------------------------|------------------------------------------------------|--------|---------|-------------|-------|-------------|
|                                                                                          | index                                                | parent | sibling | grandparent | other | total       |
| Individual with known birth weight                                                       | 2242                                                 | -      | -       | -           | -     | 2242        |
| Bled for DNA and successfully genotyped for <i>FTO</i>                                   | 1379                                                 | 731    | 69      | 120         | 51    | 2350        |
| <b>i) Samples available body mass analyses:</b>                                          |                                                      |        |         |             |       |             |
| Birth weight                                                                             | 1379                                                 | 0      | 0       | 0           | 0     | <b>1379</b> |
| Early weight gain - sufficient post-natal weight measurement to estimate this accurately | 1,194                                                | 68     | 48      | 0           | 7     | <b>1317</b> |
| Weight-for-height analysis - weight and height recorded                                  | 1294                                                 | 685    | 56      | 95          | 45    | 2175        |
| BMI - weight and height recorded and age >18 years                                       | 312                                                  | 684    | 23      | 95          | 35    | 1149        |
| <b>ii) Samples available fertility analyses:</b>                                         |                                                      |        |         |             |       |             |
| Age at first delivery - monitored by the midwives since the age of 14yr                  | 79                                                   | 325    | 1       | 18          | 6     | <b>429</b>  |
| Reproductive success as number of babies born - females >18 years monitor by midwives    | 164                                                  | 422    | 5       | 75          | 12    | <b>673</b>  |
| Season of birth - women who have delivered at least one baby of known date of birth      | 154                                                  | 477    | 8       | 87          | 15    | <b>741</b>  |

<sup>§</sup> Index children are those children born in the three core villages and for whom birth weight and precise date of birth were recorded.

**Table S2:** Additional results for 16 *FTO* SNPs on (A) body mass as BWT (mothers' and babies' genotypes), early weight gain and BMI and (B) indices of fertility as age at first delivery and seasonality

| (A)        | BWT (infant's genotype) <sup>1</sup> |                   |        | BWT (mother's genotype) <sup>2</sup> |                           |               | BMI (≥18yr only) <sup>3</sup> |                   |        | Early weigh gain <sup>4</sup> |                    |        |
|------------|--------------------------------------|-------------------|--------|--------------------------------------|---------------------------|---------------|-------------------------------|-------------------|--------|-------------------------------|--------------------|--------|
|            | SNP                                  | coef              | CI95%  | p                                    | coef                      | CI95%         | p                             | coef              | CI95%  | p                             | coef               | CI95%  |
| rs6499642  | 0.0141                               | (-0.0241, 0.0523) | 0.4602 | -0.0140                              | (-0.0652, 0.0372)         | 0.5847        | 0.1029                        | (-0.2115, 0.4173) | 0.5128 | -0.0157                       | (-0.0685, 0.0372)  | 0.5529 |
| rs6499643  | 0.0262                               | (-0.0096, 0.0620) | 0.1436 | 0.0093                               | (-0.0391, 0.0577)         | 0.7006        | 0.1778                        | (-0.1172, 0.4728) | 0.2281 | -0.0401                       | (-0.0897, 0.0096)  | 0.1063 |
| rs7206790  | 0.0032                               | (-0.0323, 0.0387) | 0.8563 | 0.0181                               | (-0.0300, 0.0662)         | 0.4519        | -0.0926                       | (-0.3951, 0.2100) | 0.5405 | 0.0094                        | (-0.0402, 0.0590)  | 0.7050 |
| rs9940646  | 0.0093                               | (-0.0258, 0.0445) | 0.5964 | -0.0275                              | (-0.0772, 0.0222)         | 0.2681        | -0.0349                       | (-0.3430, 0.2732) | 0.8210 | -0.0022                       | (-0.0505, 0.0461)  | 0.9267 |
| rs12447107 | 0.0143                               | (-0.0233, 0.0519) | 0.4479 | 0.0063                               | (-0.0453, 0.0579)         | 0.8085        | -0.0798                       | (-0.4042, 0.2446) | 0.6226 | 0.0265                        | (-0.0257, 0.0786)  | 0.3102 |
| rs17817288 | 0.0093                               | (-0.0286, 0.0472) | 0.6239 | -0.0001                              | (-0.0466, 0.0464)         | 0.9968        | 0.0241                        | (-0.2839, 0.3321) | 0.8756 | -0.0174                       | (-0.0702, 0.0354)  | 0.5102 |
| rs16945088 | 0.0186                               | (-0.0176, 0.0547) | 0.3040 | -0.0007                              | (-0.0489, 0.0474)         | 0.9752        | 0.1159                        | (-0.1887, 0.4205) | 0.4466 | -0.0162                       | (-0.0667, 0.0343)  | 0.5204 |
| rs17817449 | -0.0055                              | (-0.0424, 0.0315) | 0.7671 | -0.0178                              | (-0.0660, 0.0304)         | 0.4601        | -0.1799                       | (-0.4867, 0.1270) | 0.2410 | 0.0307                        | (-0.0208, 0.0823)  | 0.2328 |
| rs8063946  | 0.0220                               | (-0.0141, 0.0581) | 0.2225 | 0.0070                               | (-0.0400, 0.0540)         | 0.7664        | 0.0514                        | (-0.2495, 0.3523) | 0.7328 | -0.0014                       | (-0.0522, 0.0493)  | 0.9555 |
| rs3751812  | -0.0202                              | (-0.1038, 0.0634) | 0.6288 | -0.1210                              | (-0.2251, -0.0168)        | 0.0202        | -0.3999                       | (-1.1125, 0.3128) | 0.2618 | -0.1279                       | (-0.2414, -0.0145) | 0.0241 |
| rs3751813  | -0.0031                              | (-0.0379, 0.0318) | 0.8609 | 0.0403                               | (-0.0080, 0.0886)         | 0.0952        | 0.0556                        | (-0.2523, 0.3635) | 0.7181 | -0.0122                       | (-0.0609, 0.0365)  | 0.6165 |
| rs9939609  | 0.0045                               | (-0.0303, 0.0392) | 0.7971 | -0.0213                              | (-0.0696, 0.0270)         | 0.3774        | -0.0631                       | (-0.3626, 0.2364) | 0.6735 | 0.0095                        | (-0.0390, 0.0580)  | 0.6961 |
| rs9931494  | 0.0067                               | (-0.0457, 0.0590) | 0.7993 | <b>-0.0843</b>                       | <b>(-0.1469, -0.0217)</b> | <b>0.0071</b> | -0.1592                       | (-0.6004, 0.2819) | 0.4703 | -0.0379                       | (-0.1110, 0.0351)  | 0.2990 |
| rs7190492  | -0.0074                              | (-0.0487, 0.0339) | 0.7209 | -0.0203                              | (-0.0790, 0.0383)         | 0.4884        | -0.1737                       | (-0.5253, 0.1779) | 0.3232 | -0.0578                       | (-0.1149, -0.0006) | 0.0432 |
| rs7204609  | -0.0014                              | (-0.0380, 0.0353) | 0.9408 | 0.0308                               | (-0.0175, 0.0792)         | 0.2021        | -0.1369                       | (-0.4460, 0.1723) | 0.3759 | 0.0598                        | (0.0088, 0.1108)   | 0.0191 |
| rs9935403  | -0.0015                              | (-0.0491, 0.0462) | 0.9514 | 0.0433                               | (-0.0180, 0.1047)         | 0.1579        | 0.3654                        | (-0.0129, 0.7438) | 0.0534 | 0.0049                        | (-0.0619, 0.0716)  | 0.8843 |

<sup>1</sup> Sample size ranged between 1133 and 1151 and the number of family groups between 456 and 462 depending on SNP. Family group sizes ranged between 1 and 8.

<sup>2</sup> Sample size ranged between 975 and 1011 and number of family groups between 667 and 689 depending on SNP. Family group sizes ranged between 1 and 8.

<sup>3</sup> Sample size ranged between 1119 and 1167 and the number of family groups between 667 and 689 depending on SNP. Family group sizes ranged between 1 and 7.

<sup>4</sup> Sample size ranged between 1126 and 1145 and the number of family groups between 427 and 432 depending on SNP. Family group sizes ranged between 1 and 8.

| (B)        | Age at first delivery* <sup>5</sup> |                   |        | Seasonality of birth <sup>6</sup> |                  |        |
|------------|-------------------------------------|-------------------|--------|-----------------------------------|------------------|--------|
|            | SNP                                 | coef              | CI95%  | p                                 | OR               | CI95%  |
| rs6499642  | -10.33%                             | (-22.77%, 4.12%)  | 0.1446 | 1.0075                            | (0.8892, 1.1416) | 0.9043 |
| rs6499643  | -12.03%                             | (-23.38%, 0.99%)  | 0.0633 | 1.0443                            | (0.9252, 1.1788) | 0.4741 |
| rs7206790  | -2.10%                              | (-16.55%, 14.85%) | 0.7907 | 1.0853                            | (0.9681, 1.2167) | 0.1519 |
| rs9940646  | -3.82%                              | (-16.89%, 11.30%) | 0.5935 | 1.0874                            | (0.9612, 1.2303) | 0.1745 |
| rs12447107 | 2.76%                               | (-11.18%, 18.89%) | 0.7087 | 1.0716                            | (0.9438, 1.2168) | 0.2759 |
| rs17817288 | 4.90%                               | (-10.29%, 22.68%) | 0.5407 | 1.0161                            | (0.9004, 1.1466) | 0.7920 |
| rs16945088 | -1.11%                              | (-15.10%, 15.19%) | 0.8839 | 1.0557                            | (0.9432, 1.1816) | 0.3359 |
| rs17817449 | 6.16%                               | (-9.13%, 24.01%)  | 0.4421 | 1.0763                            | (0.9550, 1.2130) | 0.2185 |
| rs8063946  | -0.36%                              | (-14.18%, 15.68%) | 0.9615 | 1.0227                            | (0.9148, 1.1435) | 0.6868 |
| rs3751812  | 4.60%                               | (-26.03%, 47.92%) | 0.7951 | 1.0202                            | (0.8088, 1.2870) | 0.8631 |
| rs3751813  | -0.77%                              | (-14.38%, 15.00%) | 0.9160 | 0.9885                            | (0.8736, 1.1184) | 0.8508 |
| rs9939609  | 7.38%                               | (-7.25%, 24.31%)  | 0.3311 | 1.0467                            | (0.9271, 1.1817) | 0.4522 |
| rs9931494  | 4.12%                               | (-17.76%, 31.82%) | 0.7321 | 0.9579                            | (0.8126, 1.1293) | 0.6013 |
| rs7190492  | 2.59%                               | (-13.37%, 21.50%) | 0.7621 | 0.9613                            | (0.8336, 1.1086) | 0.5798 |
| rs7204609  | 0.50%                               | (-12.65%, 15.63%) | 0.9435 | 1.0091                            | (0.8973, 1.1348) | 0.8778 |
| rs6499642  | -10.33%                             | (-22.77%, 4.12%)  | 0.1446 | 1.0075                            | (0.8892, 1.1416) | 0.9043 |
| rs6499643  | -12.03%                             | (-23.38%, 0.99%)  | 0.0633 | 1.0443                            | (0.9252, 1.1788) | 0.4741 |
| rs9935403  | 2.95%                               | (-15.57%, 25.54%) | 0.7692 | 0.9247                            | (0.7897, 1.0828) | 0.3214 |

<sup>5</sup> Sample size ranged between 417 and 428.

<sup>6</sup> Sample size ranged between 721 and 738.

\* Fitted to a proportional hazard model: the coefficient indicates the proportional difference (per allele copy) in the “instantaneous hazard” of a woman delivery her first child at a given age.

The tabulated p-values are not corrected for multiple testing. While it is inevitable that some SNPs were significantly associated ( $p < 0.05$ ) with some of the six outcomes assessed in this study, the number of such associations was no greater than might be expected given the number of tests applied. Furthermore, no one association achieved a p-value less than 0.0033 as required by the Bonferroni correction for the best of 16 tests and significance at the 5% level.

**Table S3:** Distribution of BMI in Gambian study population

| Sex                   | Age group [y] | BMI    |       |       |      | N (all) |
|-----------------------|---------------|--------|-------|-------|------|---------|
|                       |               | <18    | 18-25 | 25-30 | >30  |         |
| F                     | 0 - 10        | 97.80  | 1.50  | 0.00  | 0.70 | 267     |
|                       | 10 - 18       | 61.70  | 35.70 | 2.30  | 0.30 | 308     |
|                       | 18 - 30       | 8.70   | 79.40 | 9.30  | 2.50 | 355     |
|                       | 30 - 45       | 7.70   | 69.40 | 17.10 | 5.90 | 222     |
|                       | 45 - 60       | 9.80   | 69.90 | 14.40 | 5.90 | 153     |
|                       | > 60          | 19.40  | 68.40 | 10.20 | 2.00 | 98      |
|                       | M             | 0 - 10 | 98.10 | 1.60  | 0.00 | 0.30    |
| 10 - 18               |               | 83.80  | 15.00 | 0.00  | 1.20 | 253     |
| 18 - 30               |               | 14.90  | 83.30 | 1.80  | 0.00 | 168     |
| 30 - 45               |               | 7.40   | 81.90 | 8.50  | 2.10 | 94      |
| 45 - 60               |               | 4.80   | 81.70 | 11.50 | 1.90 | 104     |
| >60                   |               | 20.20  | 70.20 | 6.00  | 3.60 | 84      |
| <b>all over 18 yr</b> |               |        |       |       |      |         |
| F                     | > 18          | 9.90   | 73.70 | 12.40 | 4.00 | 828     |
| M                     | > 18          | 12.00  | 80.20 | 6.20  | 1.60 | 450     |
